# Supplementary material for: Menin Enhances Androgen Receptor-Independent Proliferation and Migration of Prostate Cancer Cells
Source: PubMed Central journal article supplement — Mol Cells. 2022 Jan 3;45(4):202–15. doi: 10.14348/molcells.2021.0206 (PMC9001152; doi:10.14348/molcells.2021.0206), 2022-01-03

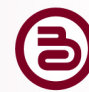

**Supplementary Table S1.** siRNA

| siRNA      |           | Sequence                            |
|------------|-----------|-------------------------------------|
| AR         | Sense     | 5'- AAG AAG GCC AGU UGU AUG GAC -3' |
|            | Antisense | 5'-GUC CAU ACA ACU GGC CUU CUU -3'  |
| MEN1 #1    | Sense     | 5'- CCU CUA CCA CAA GGG CAU U -3'   |
|            | Antisense | 5'- AAU GCC CUU GUG GUA GAG G -3'   |
| MEN1 #2    | Sense     | 5'- UCA CUU UCC AGA GUG AGA A -3'   |
|            | Antisense | 5'- UUC UCA CUC UGG AAA GUG A -3'   |
| SUV39H1 #1 | Sense     | 5'- GGU GAA AUG GCG UGG AUA U -3'   |
|            | Antisense | 5'- AUA UCC ACG CCA UUU CAC C -3'   |
| SUV39H1 #2 | Sense     | 5'- ACG CAU CAC UGU AGA GAA U -3'   |
|            | Antisense | 5'- AUU CUC UAC AGU GAU GCG U -3'   |

**Supplementary Table S2.** RT-qPCR primer

| Gene           |         | Sequence                                |
|----------------|---------|-----------------------------------------|
| <i>AR</i>      | Forward | 5'- CAG TGG ATG GGC TGA AAA AT -3'      |
|                | Reverse | 5'- AGG AGC TTG GTG AGC TGG TA -3'      |
| <i>ACTB</i>    | Forward | 5'- GTC ACC AAC TGG GAC GAC AT -3'      |
|                | Reverse | 5'- GAG GCG TAC AGG GAT AGC AC -3'      |
| <i>CAPG</i>    | Forward | 5'- CAG GTG GAG ATT GTC ACT GAT GG -3'  |
|                | Reverse | 5'- CTG GGG ATT TGC CTT GTC AGC T -3'   |
| <i>GSN</i>     | Forward | 5'- ATC TGC CAT CCT GAC TGC TCA G -3'   |
|                | Reverse | 5'- CTT CCC ACC AAA CAG GCT CAT G -3'   |
| <i>HTRA1</i>   | Forward | 5'- CAG ACG TGA TCT CAG GAG CGT A -3'   |
|                | Reverse | 5'- TCG CTG ACA TCA TTG GCG GAG A-3'    |
| <i>LAMB3</i>   | Forward | 5'- GTC ACA GAG CAG GAG GTG GCT -3'     |
|                | Reverse | 5'- GCT TCT GTC AAG ACT CTC CAG G -3'   |
| <i>MEN1</i>    | Forward | 5'- GTG GCC GAC CTG TCT ATC AT -3'      |
|                | Reverse | 5'- GTG CCT GTG ATG AAG CTG AA -3'      |
| <i>SUV39H1</i> | Forward | 5'- GAT ATG ACC TCT GCA TCT TCC GC -3'  |
|                | Reverse | 5'- GTA CAC GTC CTC CAC GTA GTC CAG -3' |
| <i>TIMP2</i>   | Forward | 5'- AAA GCG GTC AGT GAG AAG GA -3'      |
|                | Reverse | 5'- CTT CTT TCC TCC AAC GTC CA -3'      |

**Supplementary Table S3.** TIMP2 ChIP qPCR primers

| Promoter region |         | Sequence                              |
|-----------------|---------|---------------------------------------|
| <i>TIMP2</i> #1 | Forward | 5'- CCT CTC CCT AGC TGG ACT GCA A -3' |
|                 | Reverse | 5'- GTG GGC ACC CAC CCT GT -3'        |
| <i>TIMP2</i> #2 | Forward | 5'- GCC AGG CGC ACT TAA AAT TC -3'    |
|                 | Reverse | 5'- GGG TGG CCT ATT GAG AAA CTG A -3' |
| <i>TIMP2</i> #3 | Forward | 5'- CAT TGG CCG CCA GCC AC -3'        |
|                 | Reverse | 5'- GCG CTG CCT TCT ACG GAT GT -3'    |

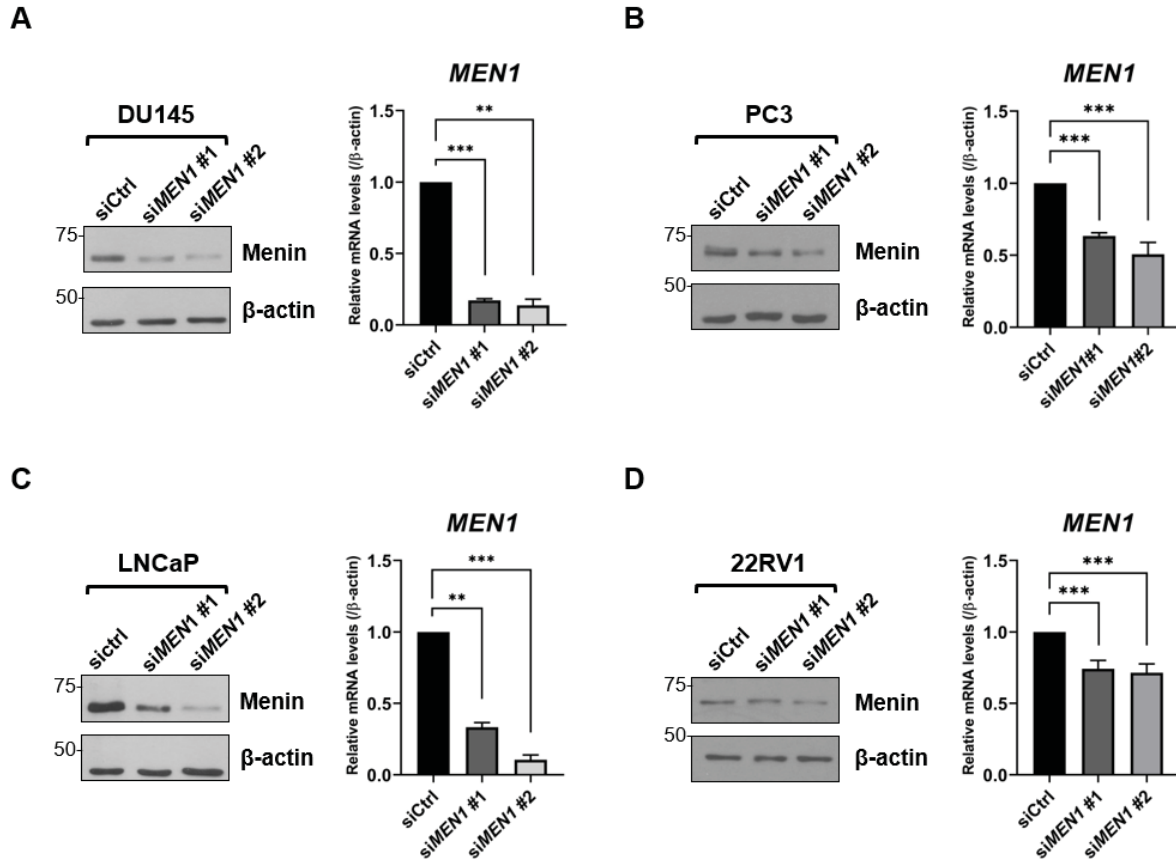

**Supplementary Fig. S1. Depletion of menin with *MEN1*-specific siRNAs.** Two independent siRNAs targeting the *MEN1* coding region were used for *MEN1* knockdown. In comparison, the siRNA targeting non-specific sequences was used as a control. Depletion of menin (67 kDa), as indicated by western blotting (WB, left) and RT-qPCR (right), is shown in DU145 (A), PC3 (B), LNCaP (C), and 22RV1 (D) cells. Beta-actin (49 kDa) was used as a loading control in WB. Beta-actin mRNA was used as an endogenous control for normalization in RT-qPCR. Bars show the mean mRNA level and SD. Statistical analyses were performed using an unpaired two-tailed *t*-test. \*\*  $P < 0.01$ ; \*\*\*  $P < 0.001$ .

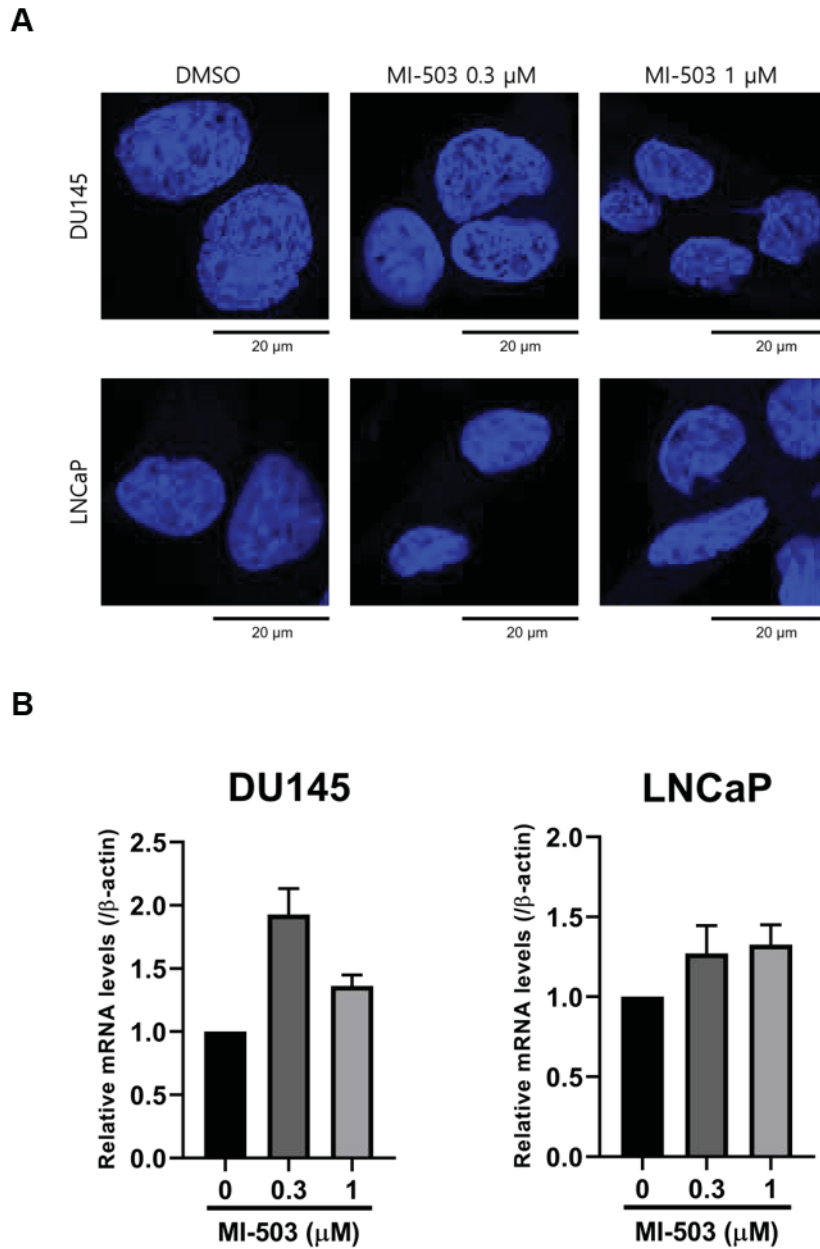

**Supplementary Fig. S2. Treatment of prostate cancer cells with MI-503.** (A) DAPI staining of MI-503-treated PCa cells. DU145 and LNCaP cells were treated with 0.3 or 1  $\mu\text{M}$  of MI-503 for 48 h. (B) RT-qPCR for MI-503-treated DU145 (left) and LNCaP (right) cells. Bars show the mean mRNA level and SD. Beta-actin mRNA was used as an endogenous control for normalization in RT-qPCR.

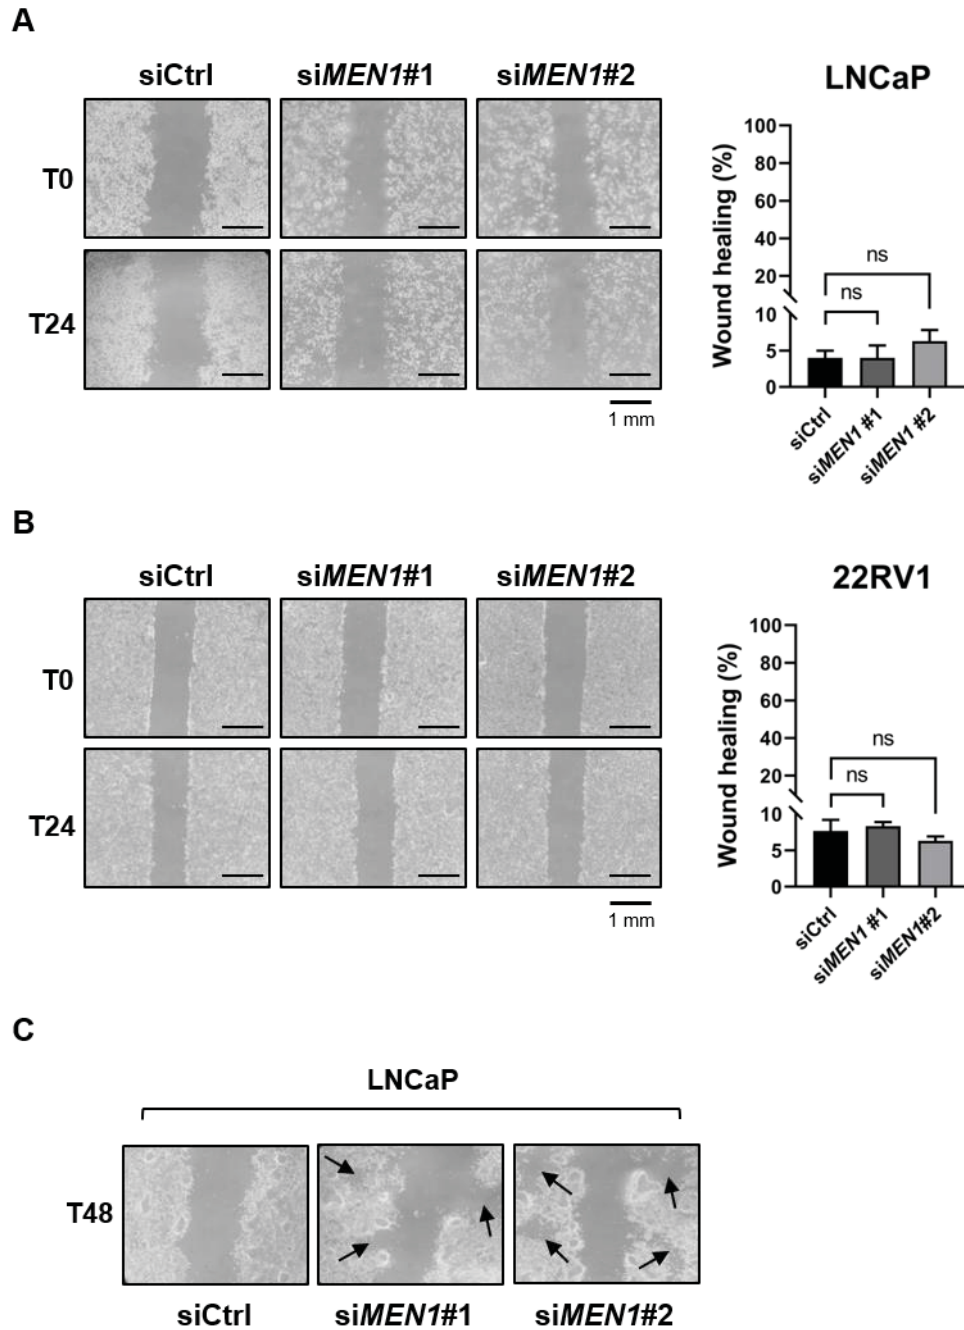

**Supplementary Fig. S3. A wound healing assay with AR-positive PCa cells.** (A and B) LNCaP (A) and 22RV1 (B) cells were scratched 48 h after siRNA transfection and the migration efficiency was analyzed 24 h after scratching. The percentage of wound healing was defined as the extent of relative wound closure (n = 3). Scale bar = 1 mm. ns, not significant. (C) Cell images of LNCaP acquired 48 h after scratch. The arrows indicate where significant populations of cells were dead and detached (n = 3).

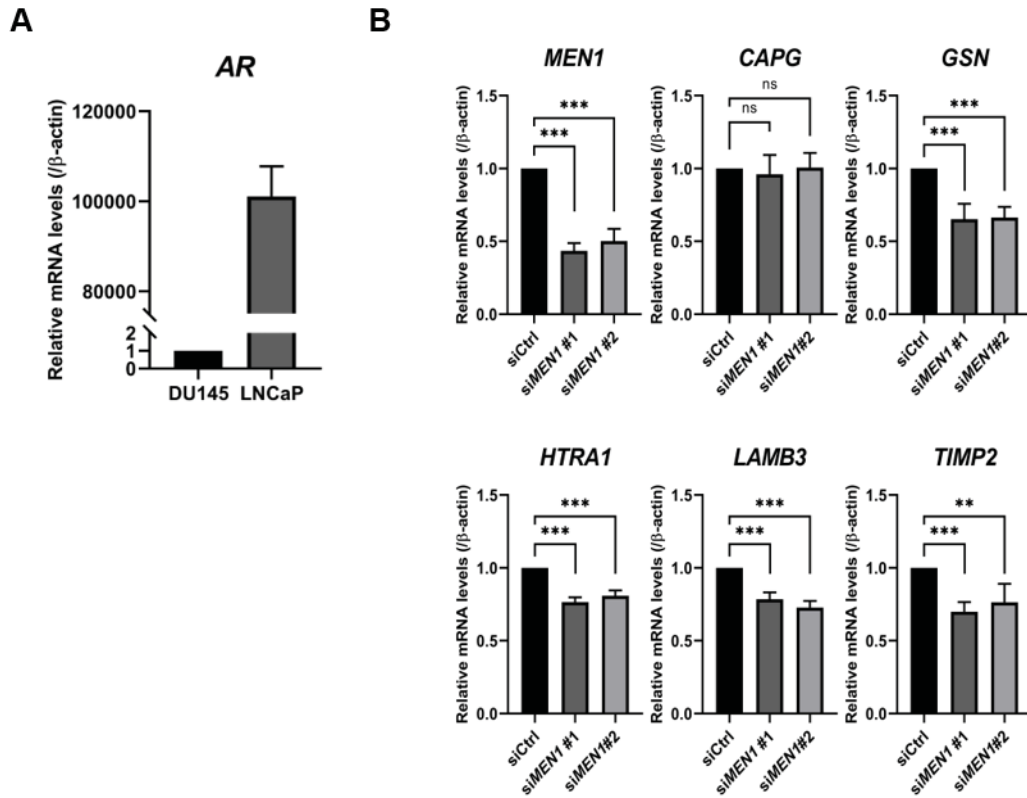

**Supplementary Fig. S4. The relative mRNA analysis of PCa cells.** (A) Total RNAs from DU145 and LNCaP cells were isolated, and the *AR* and *ACTB* (control) mRNA levels were analyzed by RT-qPCR, using gene-specific primers. (B) PC3 cells were treated with a control or *MEN1*-specific siRNAs. Bars show the mean mRNA level and SD. Statistical analyses were performed using an unpaired two-tailed *t*-test. \*\* $P < 0.01$ ; \*\*\* $P < 0.001$ ; ns, not significant.

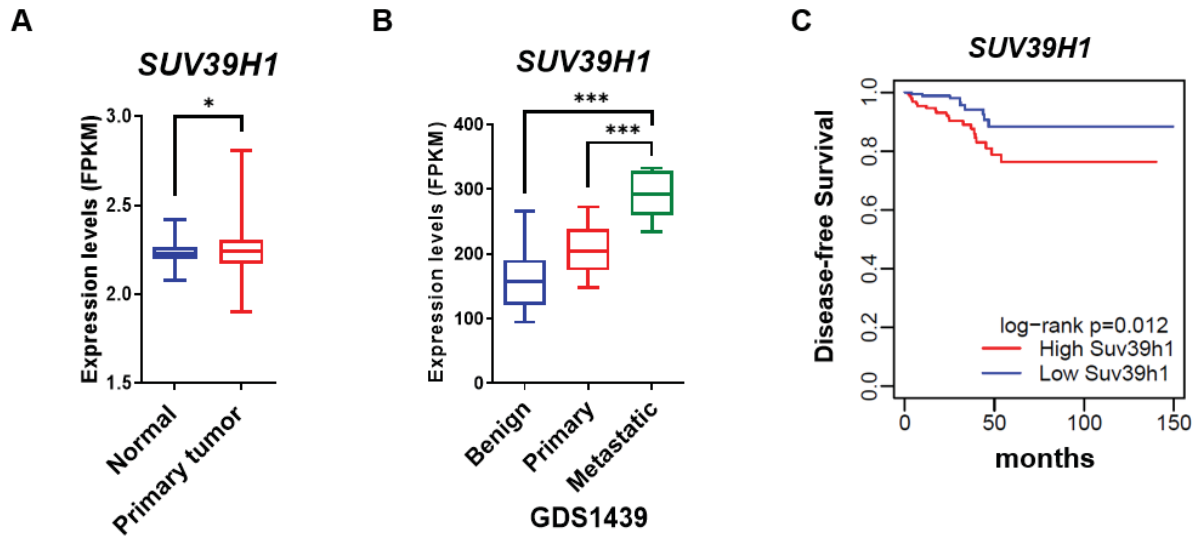

**Supplementary Fig. S5. *SUV39H1* is potentially associated with metastasis of prostate cancer.** (A) The relative mRNA expression in the TCGA cohort between normal and cancer tissues (normal = 52, primary tumor = 497). (B) Analysis of *SUV39H1* expression from the GEO profiles. Analysis of GEO dataset (GDS1439) showed a statistically significant difference between benign and cancer tissues (benign n = 6, primary tumor n = 7, and metastatic n = 6). (C) Kaplan-Meier disease-free survival analysis of prostate adenocarcinoma patients with high (n = 156, red line) and low (n = 176, blue line) *SUV39H1*. P values were determined using the log-rank test.



Full scan (uncropped) western blot images

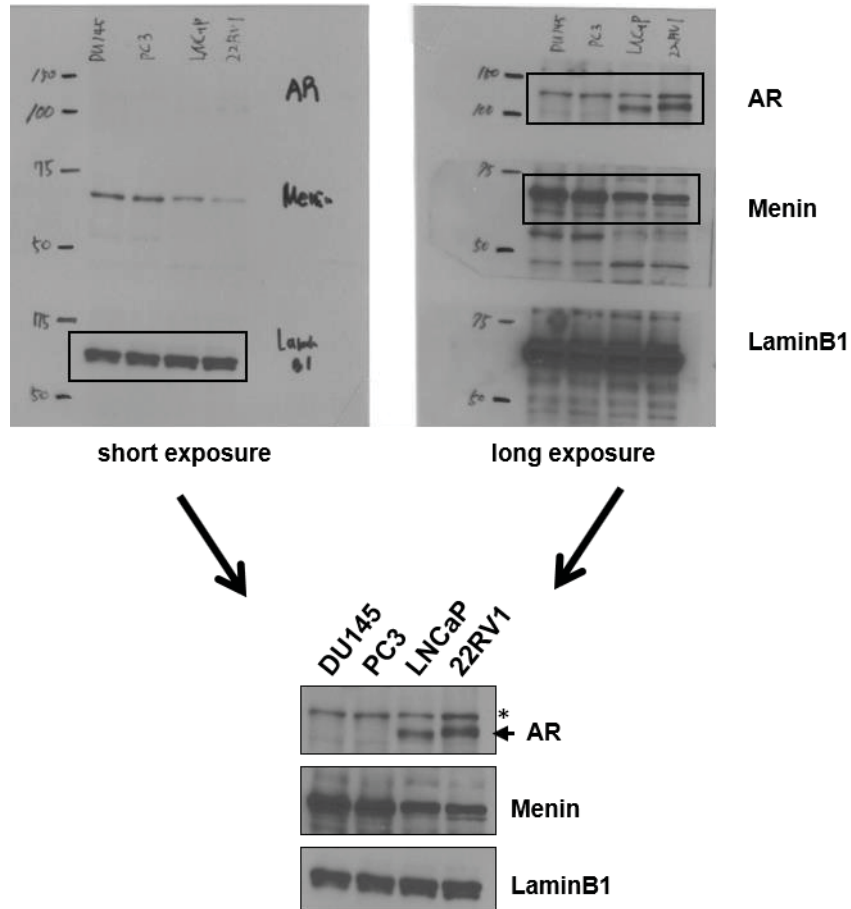

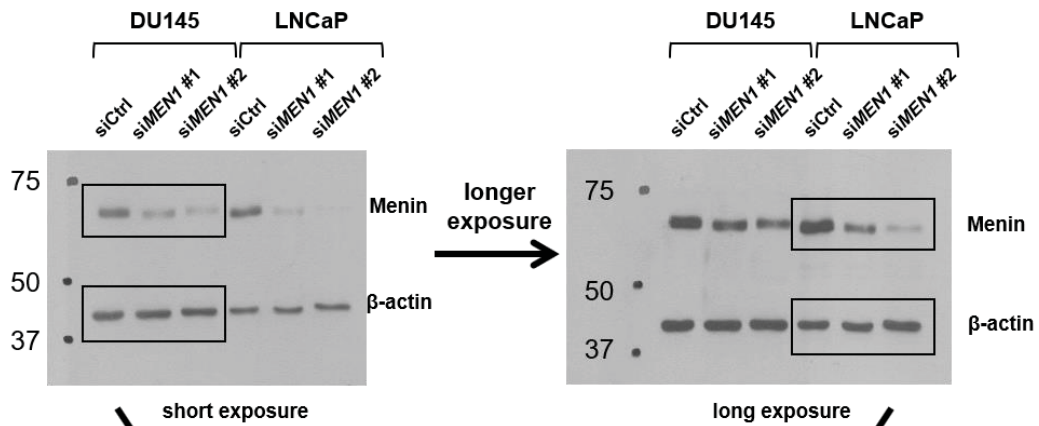

Supplementary Figure S1A

Supplementary Figure S1C

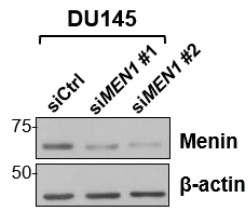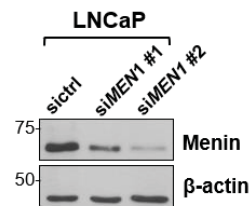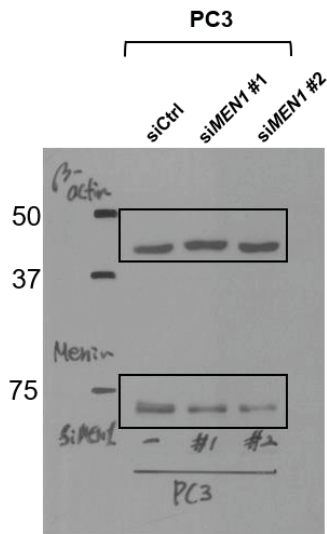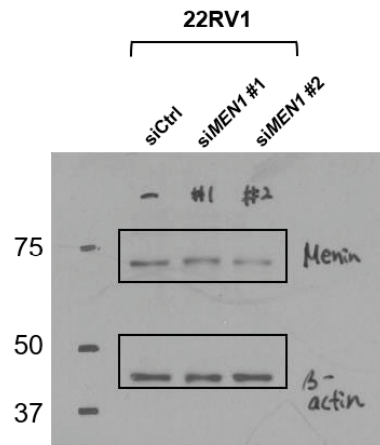

Supplementary Figure S1B

Supplementary Figure S1D

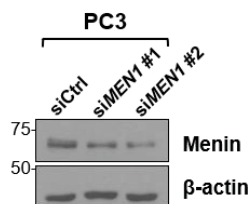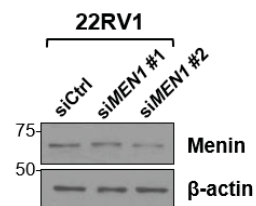

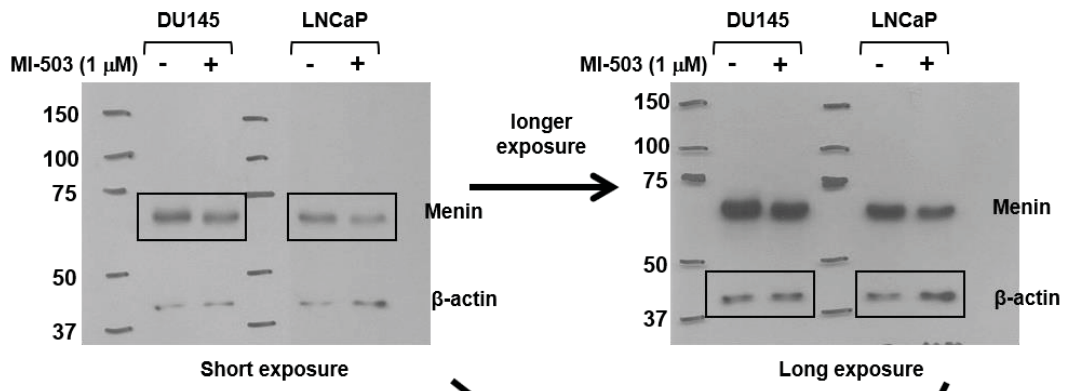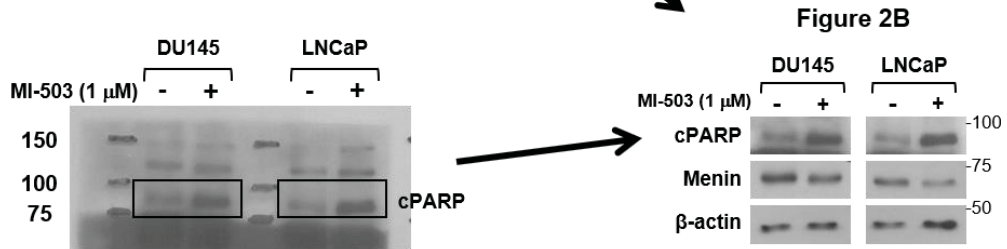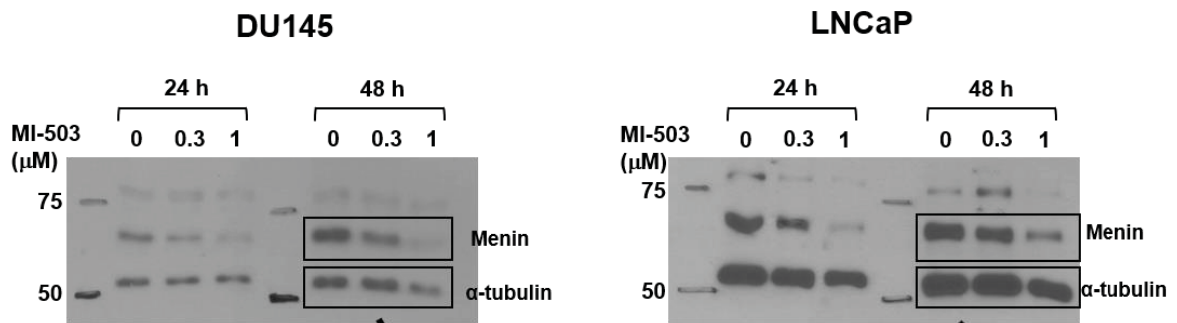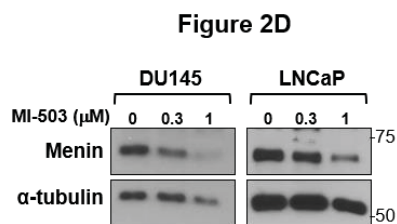

Supplement: molce-45-4-202-supple.pdf [file molce-45-4-202-supple.pdf]
